# Supplementary material for: Quantification of the enzyme activities of iduronate-2-sulfatase, N-acetylgalactosamine-6-sulfatase and N-acetylgalactosamine-4-sulfatase using liquid chromatography-tandem mass spectrometry
Source: PubMed Central journal article supplement (PMC5758840; doi:10.1016/j.ymgmr.2017.12.001), 2017-12-21
Supplement: mmc2.pdf [file mmc2.pdf]

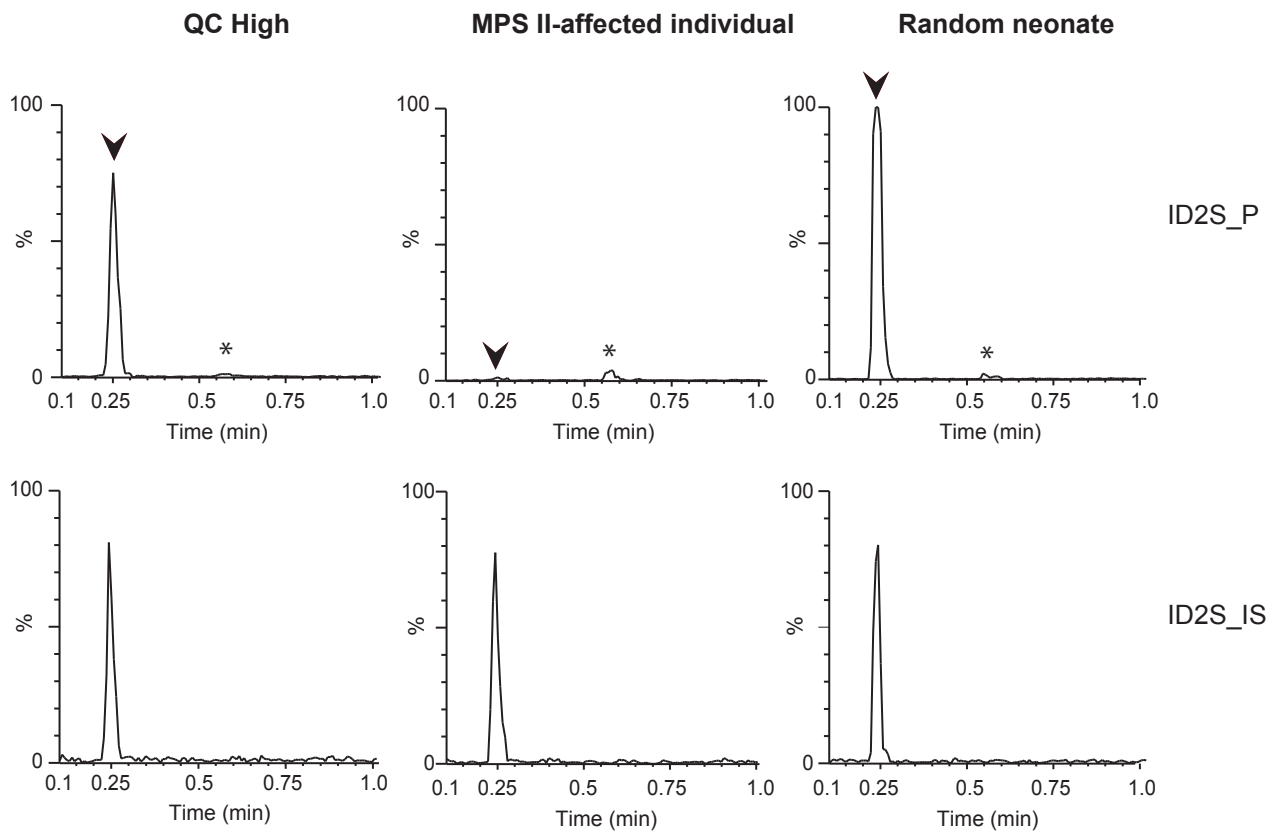

Supplemental Fig. 1  
Mashima R et al.

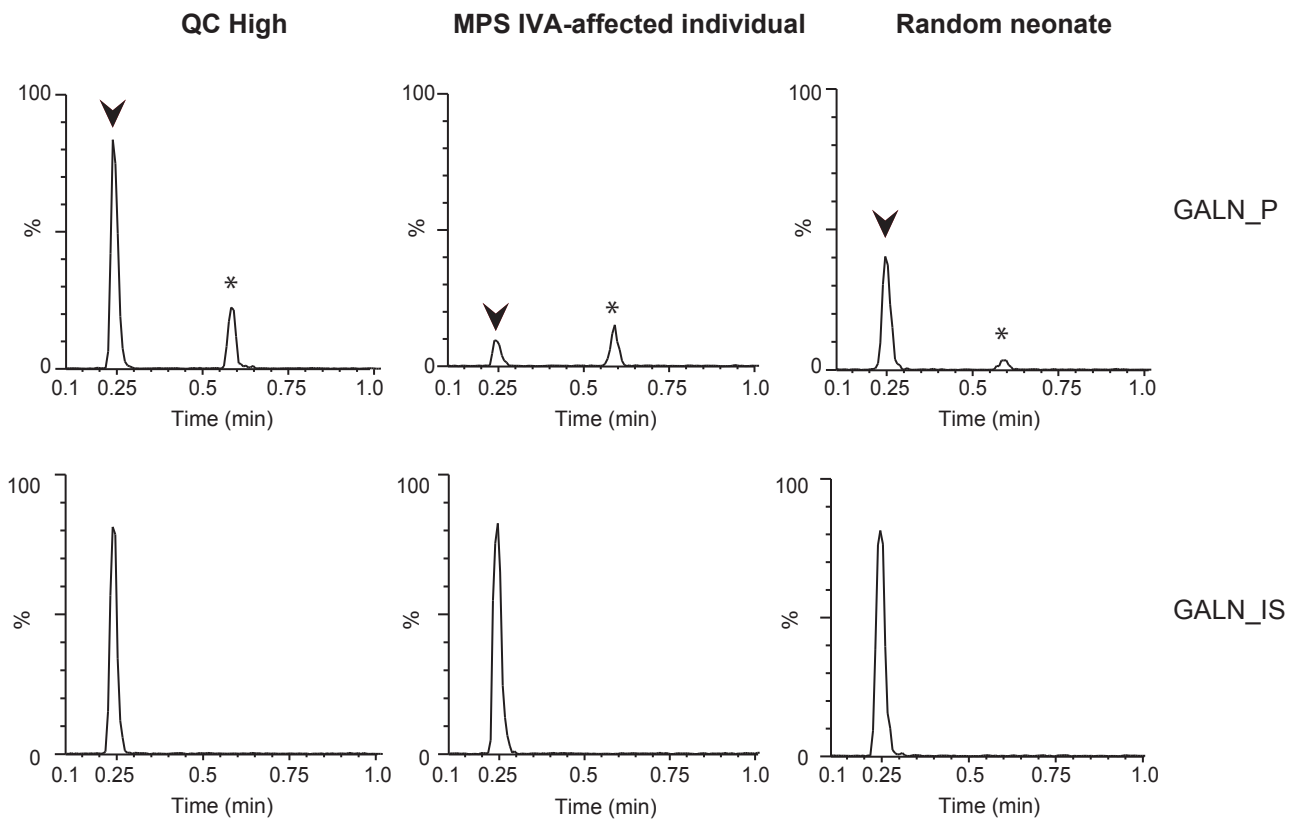

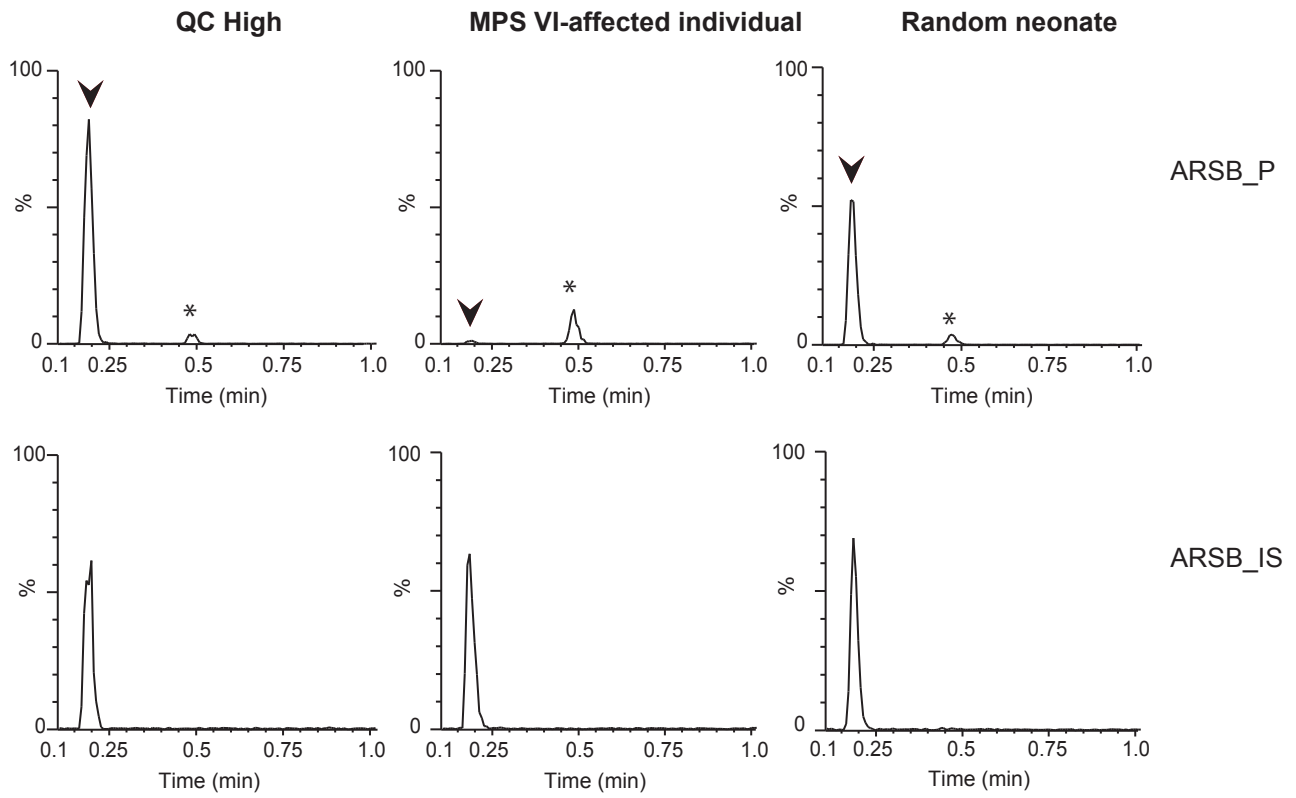

Supplemental Fig. 3  
Mashima R et al.

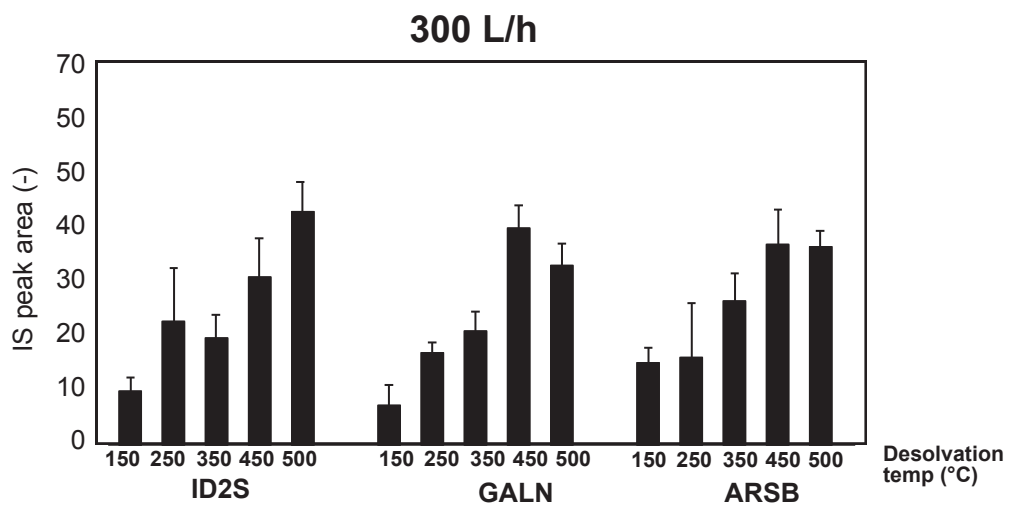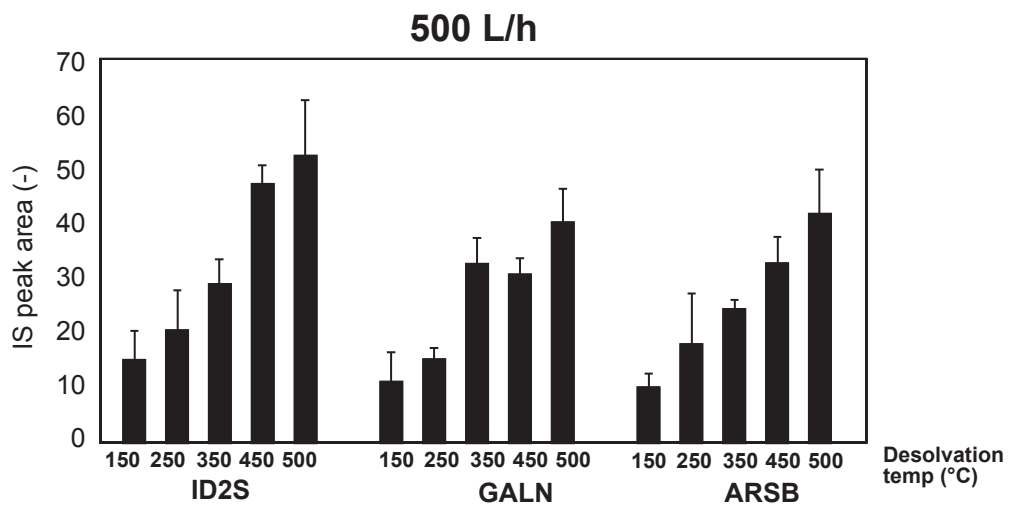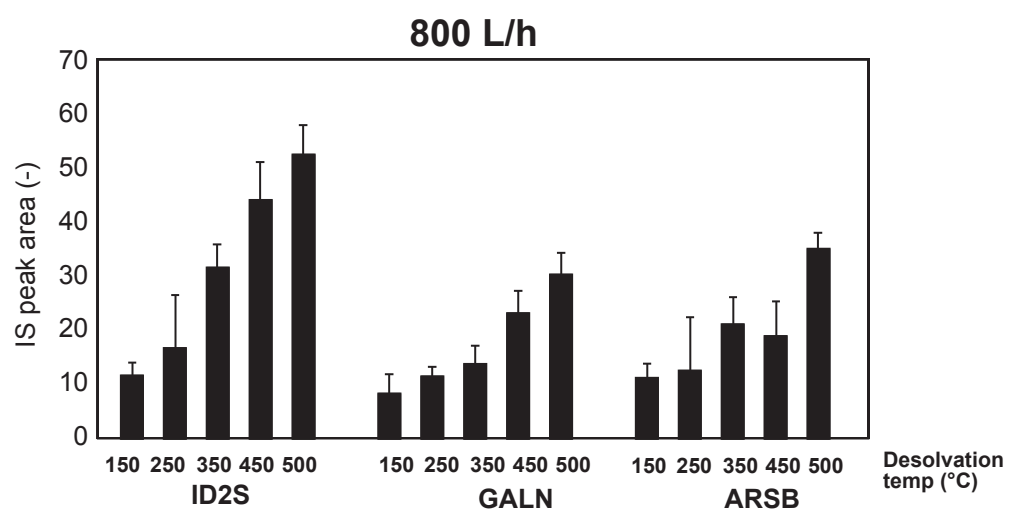

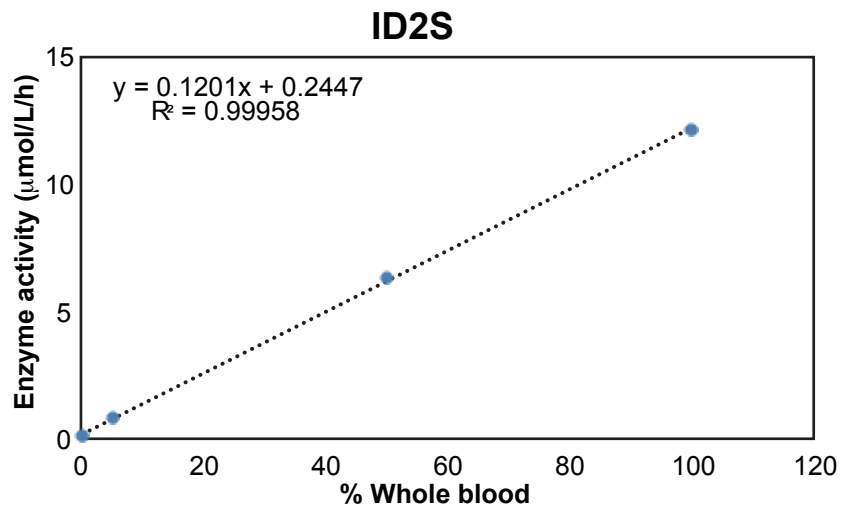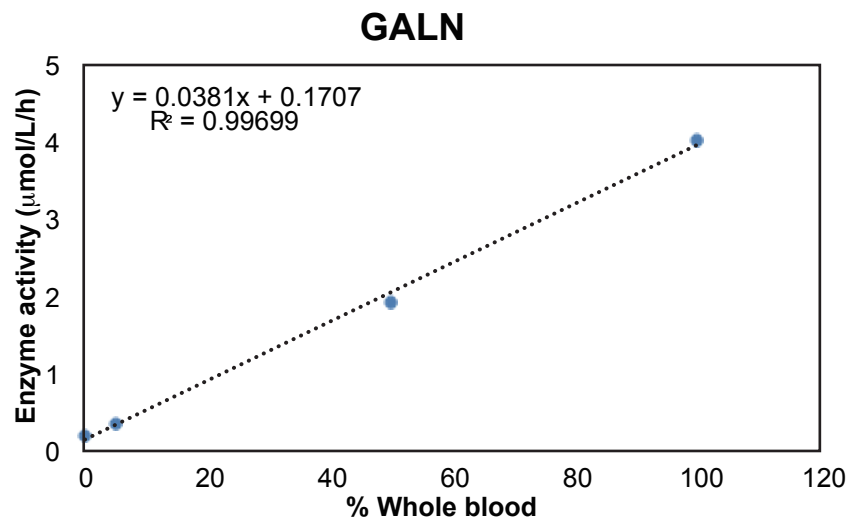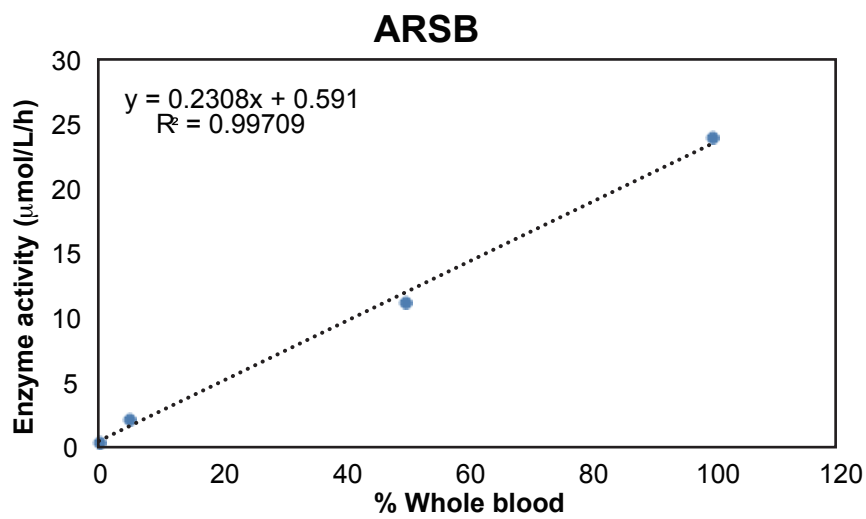

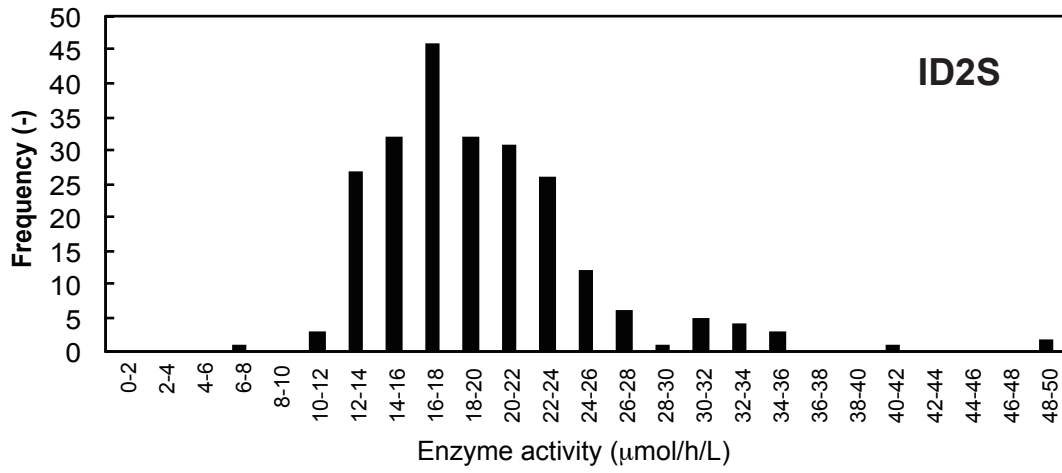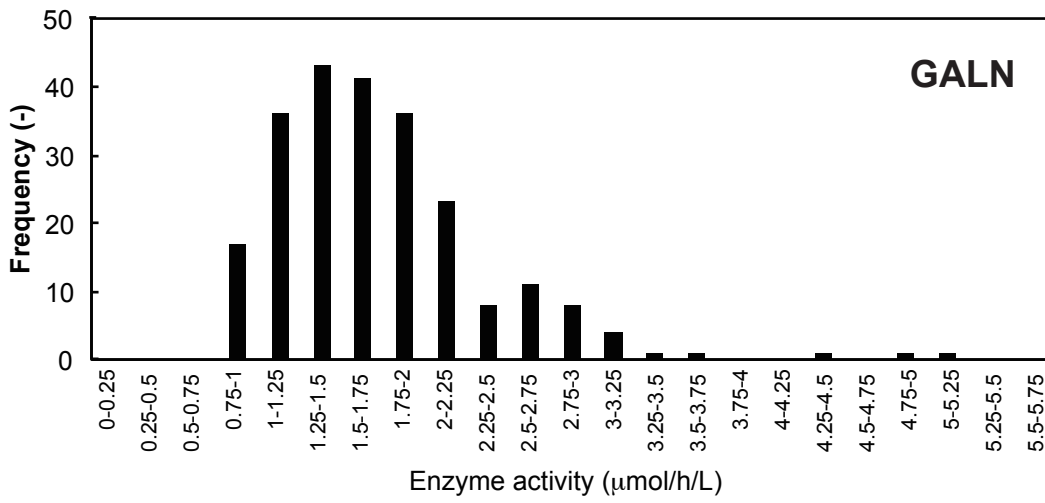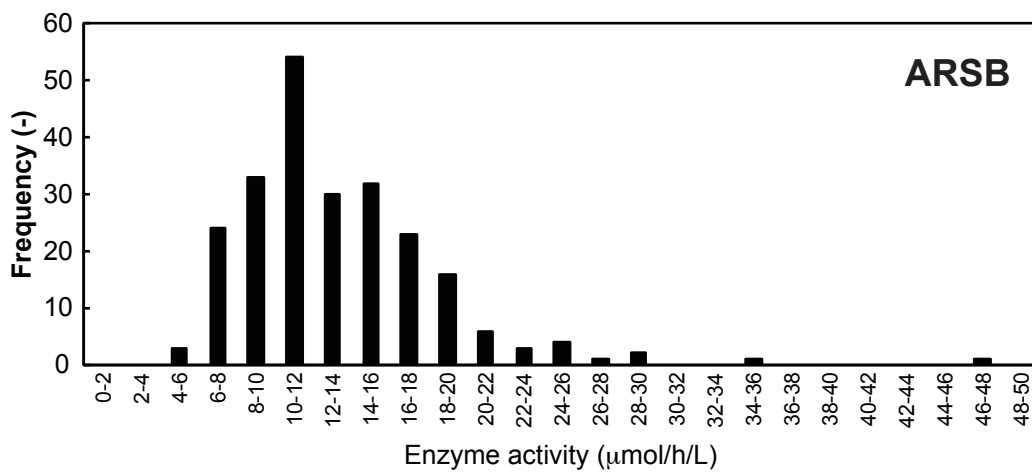

Supplemental Fig. 6  
Mashima R et al.
